# Supplementary material for: Expression and Clinical Significance of Androgen Receptor in Triple-Negative Breast Cancer
Source: MDPI journal article supplement (doi:10.3390/cancers9010004), 2017-01-06
Supplement: s1 [file s1]

# Supplementary Materials: Expression and Clinical Significance of Androgen Receptor in Triple-Negative Breast Cancer

Yuka Asano, Shinichiro Kashiwagi, Wataru Goto, Sayaka Tanaka, Tamami Morisaki, Tsutomu Takashima, Satoru Noda, Naoyoshi Onoda, Masahiko Ohsawa, Kosei Hirakawa and Masaichi Ohira

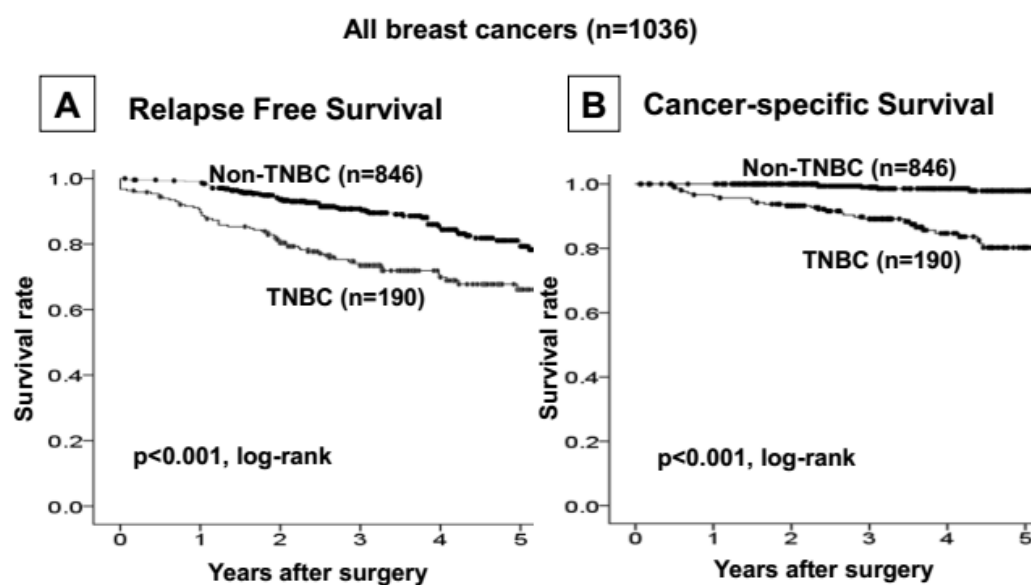

**Figure S1.** Correlation between the triple-negative phenotype and cancer specific survival and relapse-free survival. The patients with triple-negative breast cancers had a significantly poorer outcome in all breast cancers (A,B).
